# Supplementary material
Source: ML conference proceedings conference paper supplement (https://openreview.net/forum?id=d8xcdyUA6S)

Corner Peak dataset

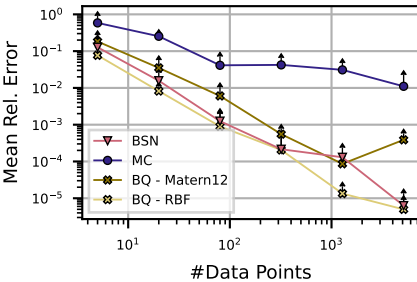

Continuous Genz dataset

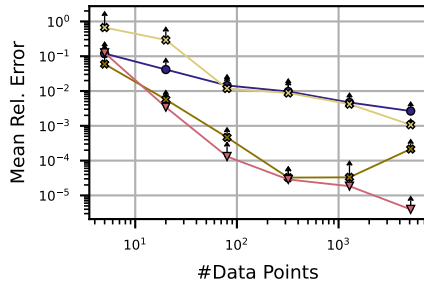

Discontinuous Genz dataset

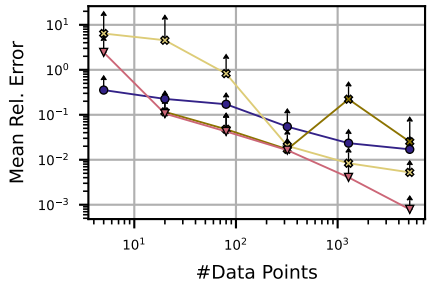

Gaussian Peak dataset

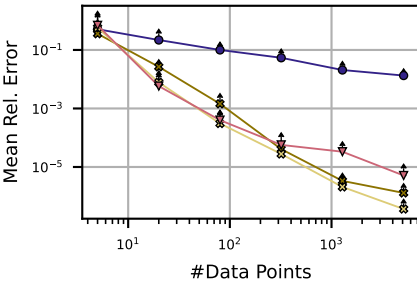

Oscillatory Genz dataset

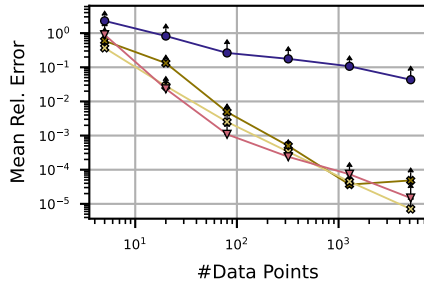

Product Peak dataset

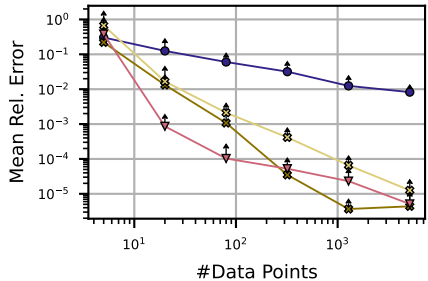

Supplement: supplementary_material [file attachment]
