# Supplementary material
Source: ML conference proceedings conference paper supplement (https://openreview.net/forum?id=d8xcdyUA6S)

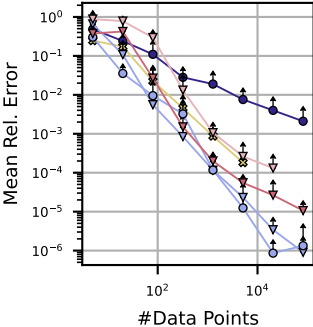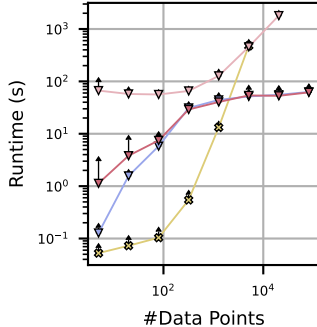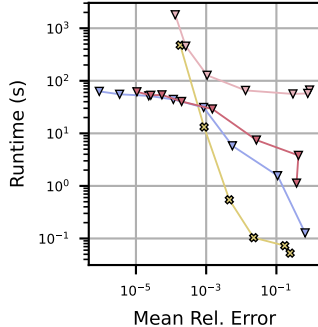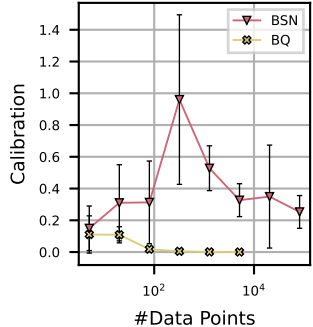

Supplement: supplementary_material [file attachment]

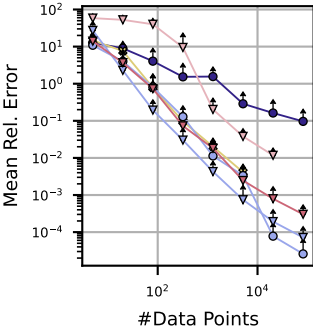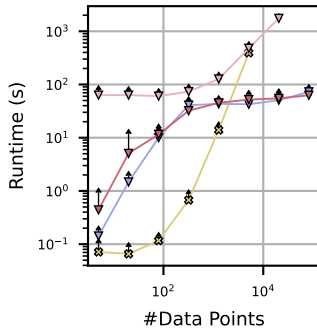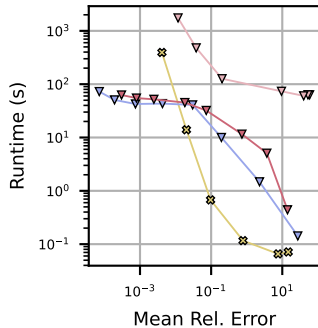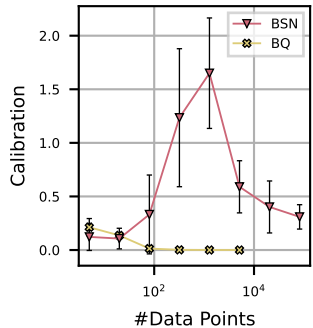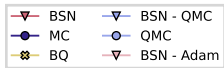

Supplement: supplementary_material [file attachment]

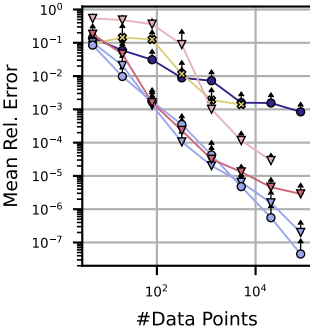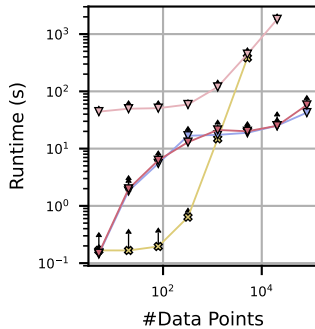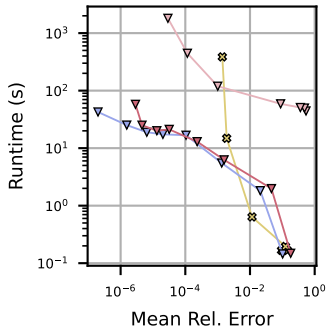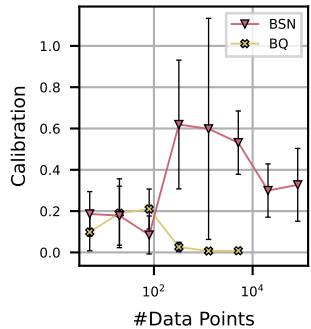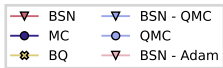

Supplement: supplementary_material [file attachment]

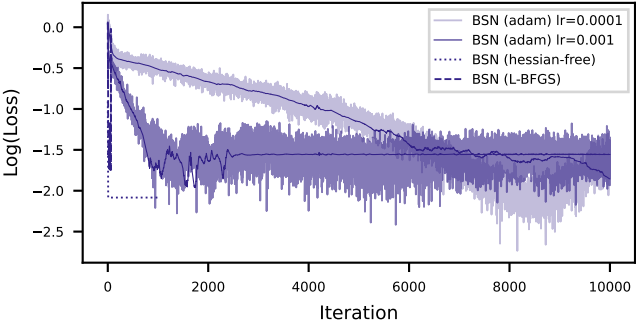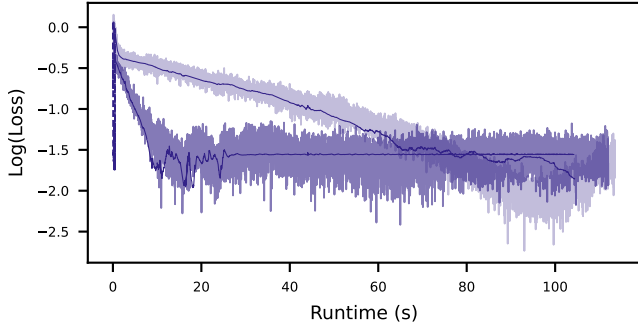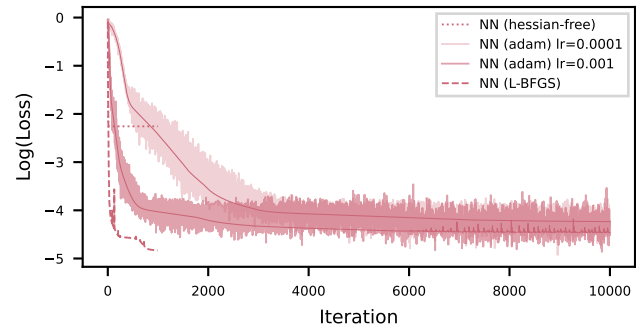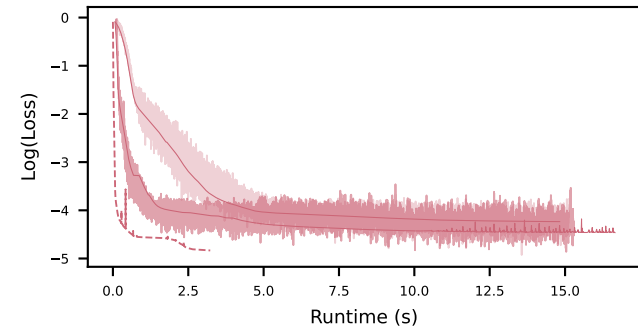

Supplement: supplementary_material [file attachment]

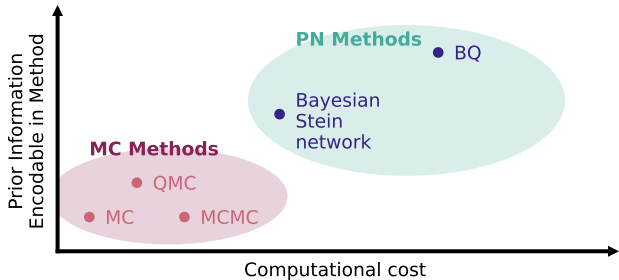

Supplement: supplementary_material [file attachment]

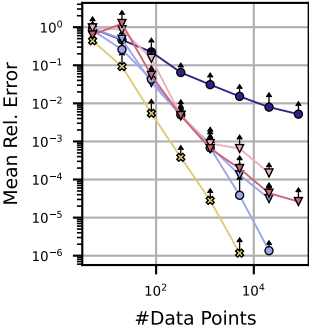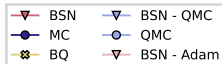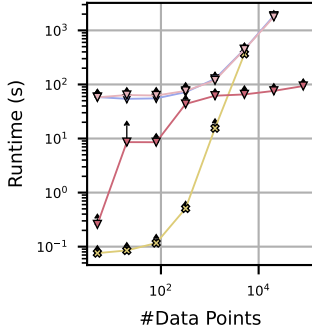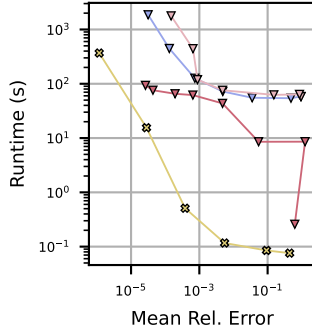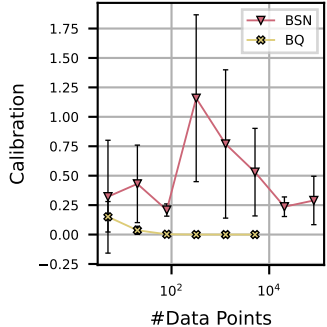

Supplement: supplementary_material [file attachment]

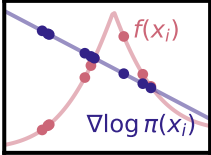

$x$

Supplement: supplementary_material [file attachment]

Parameter  $a_1$ 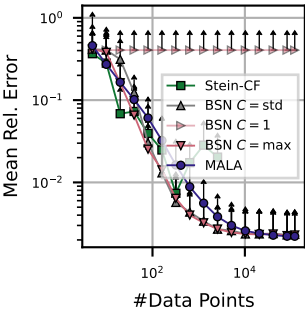Parameter  $a_1$ 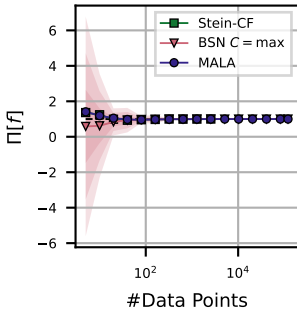Parameter  $\alpha$ 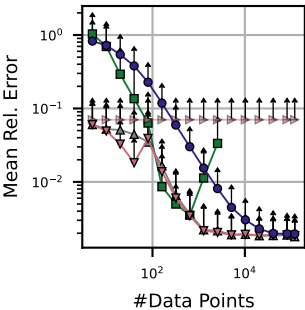Parameter  $\alpha$ 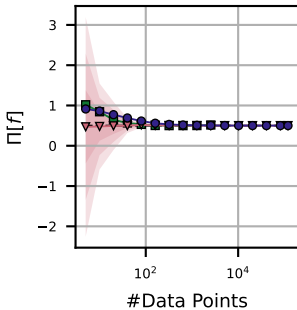

Supplement: supplementary_material [file attachment]

Mean Rel. Error

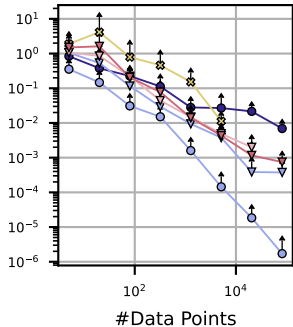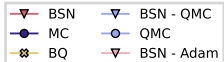

Runtime (s)

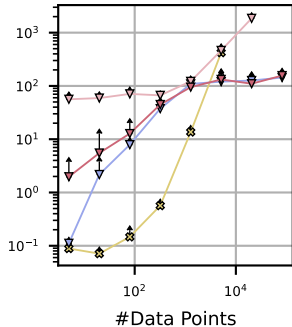

Runtime (s)

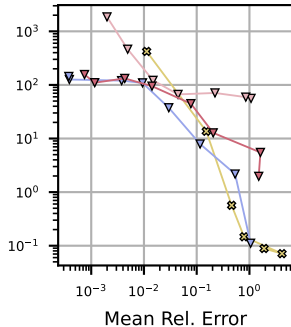

Calibration

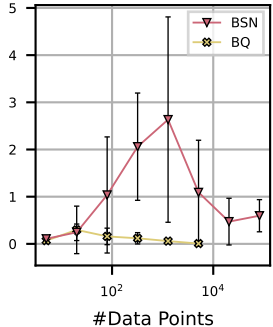

Supplement: supplementary_material [file attachment]

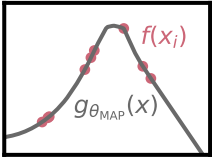

$x$

Supplement: supplementary_material [file attachment]

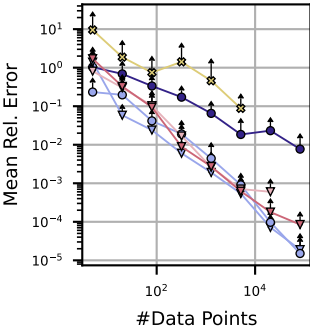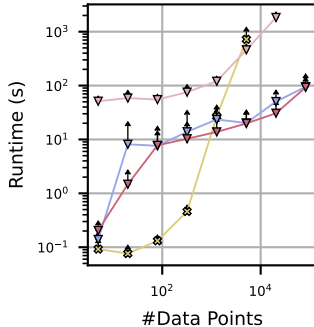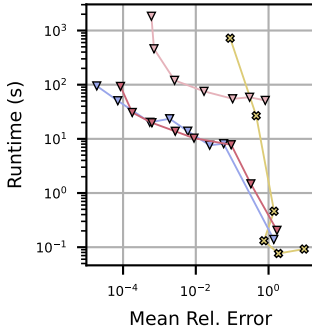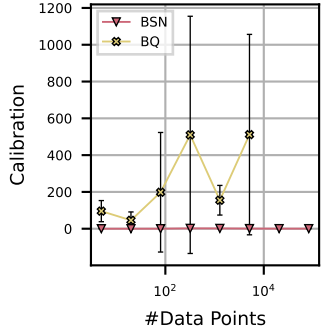

Supplement: supplementary_material [file attachment]

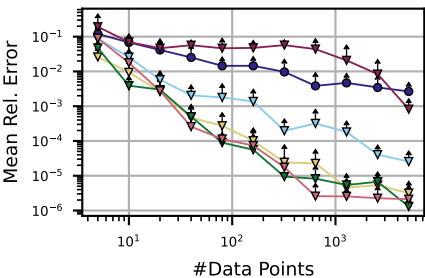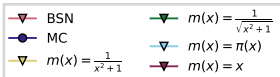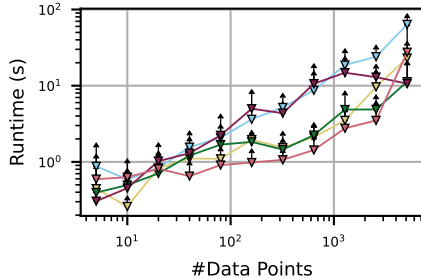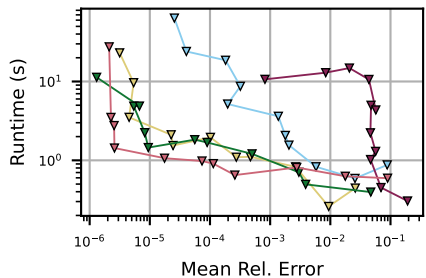

Supplement: supplementary_material [file attachment]

$\theta_{0, \text{MAP}}$

$p(\theta_0 \mid \mathcal{D})$

$\theta_0$

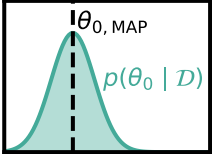

Supplement: supplementary_material [file attachment]

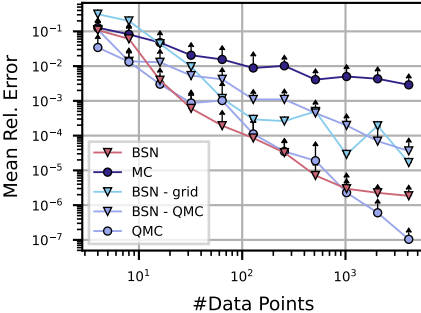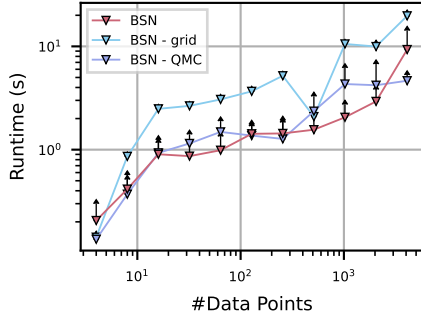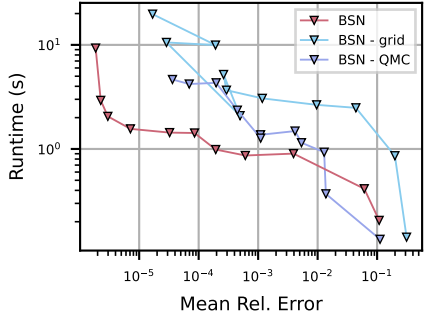

Supplement: supplementary_material [file attachment]

$n = 100$

Mean Rel. Error

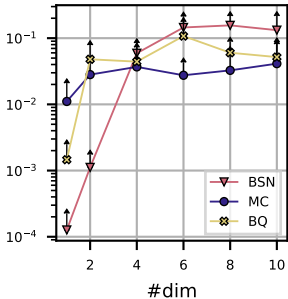

$n = 10000$

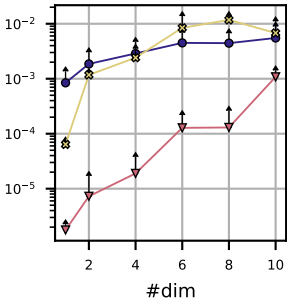

Supplement: supplementary_material [file attachment]

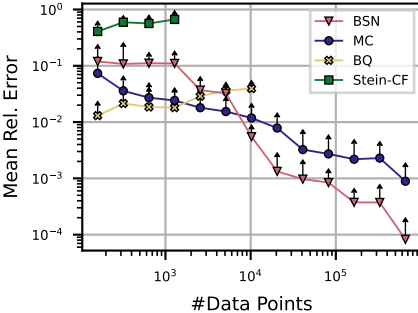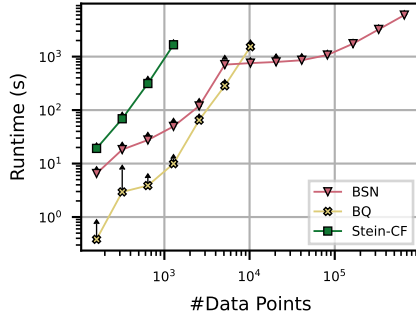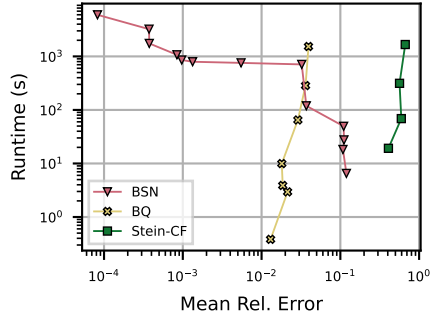

Supplement: supplementary_material [file attachment]

Max. memory (MB)

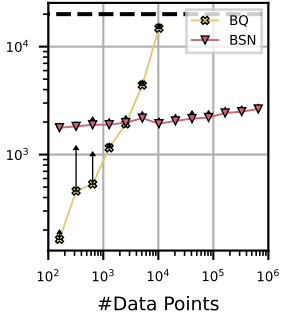

Calibration

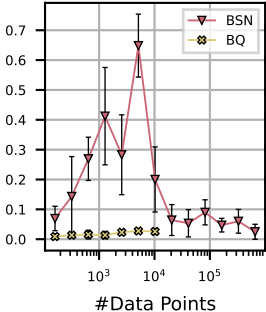

Supplement: supplementary_material [file attachment]

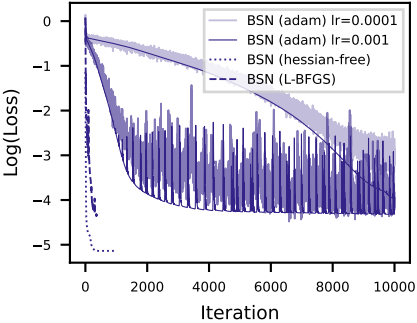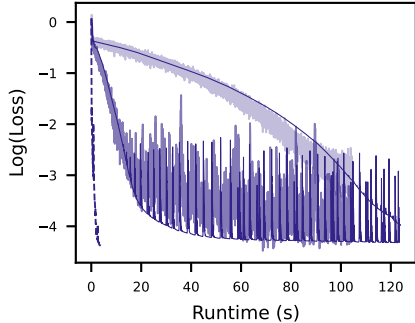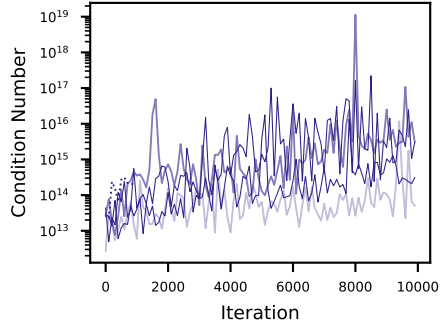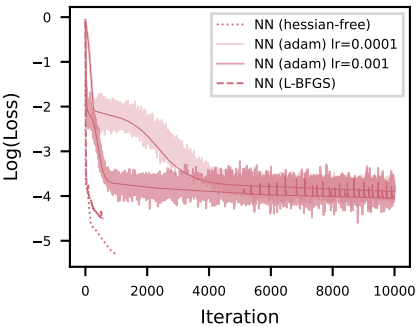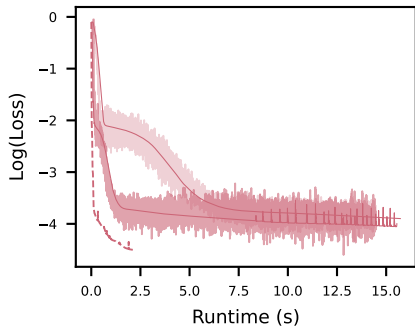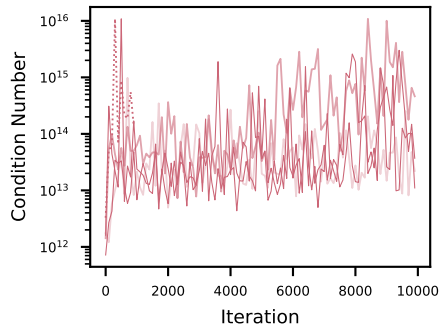

Supplement: supplementary_material [file attachment]

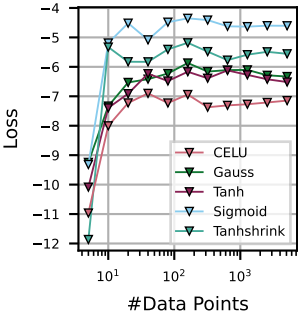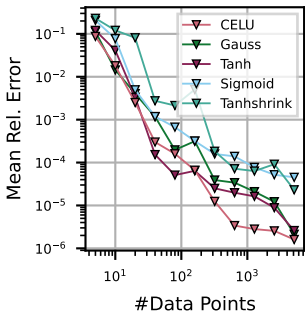

Supplement: supplementary_material [file attachment]

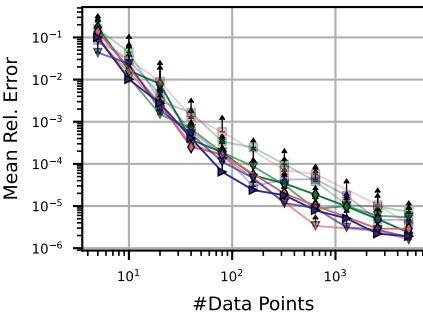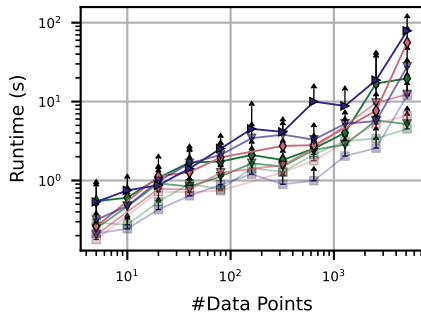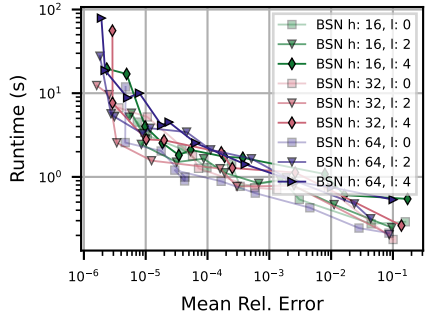

Supplement: supplementary_material [file attachment]

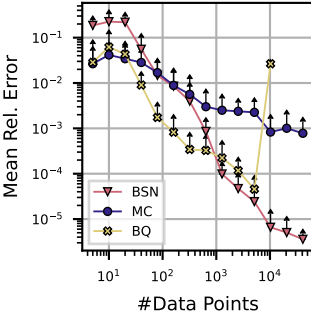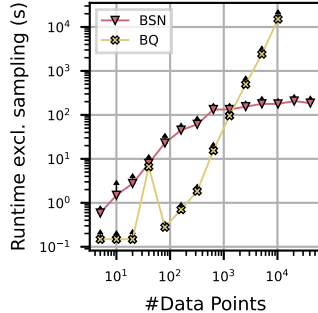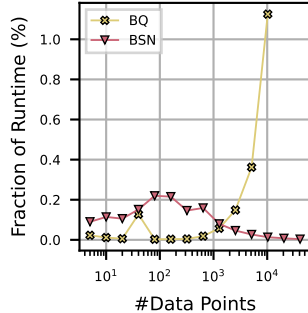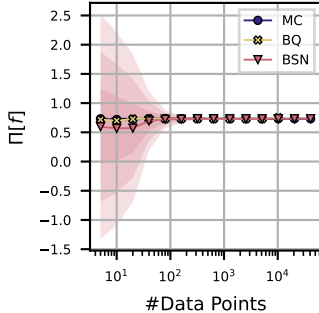

Supplement: supplementary_material [file attachment]

Parameter  $a_2$ 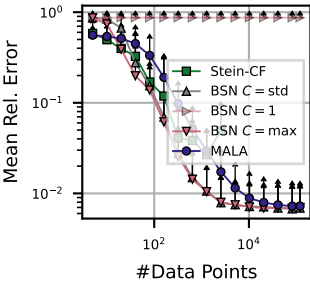Parameter  $a_2$ 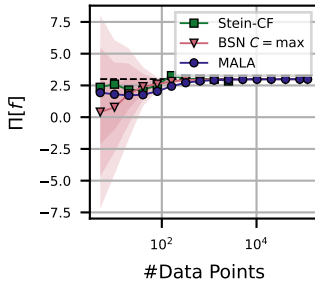Parameter  $k_1$ 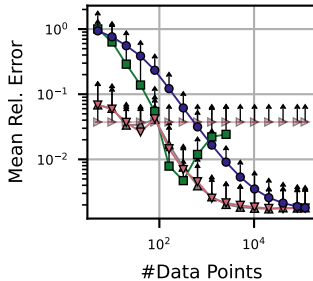Parameter  $k_1$ 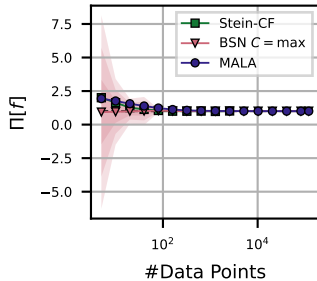

Supplement: supplementary_material [file attachment]
